# Supplementary material
Source: PubMed Central journal article supplement (PMC2692078)

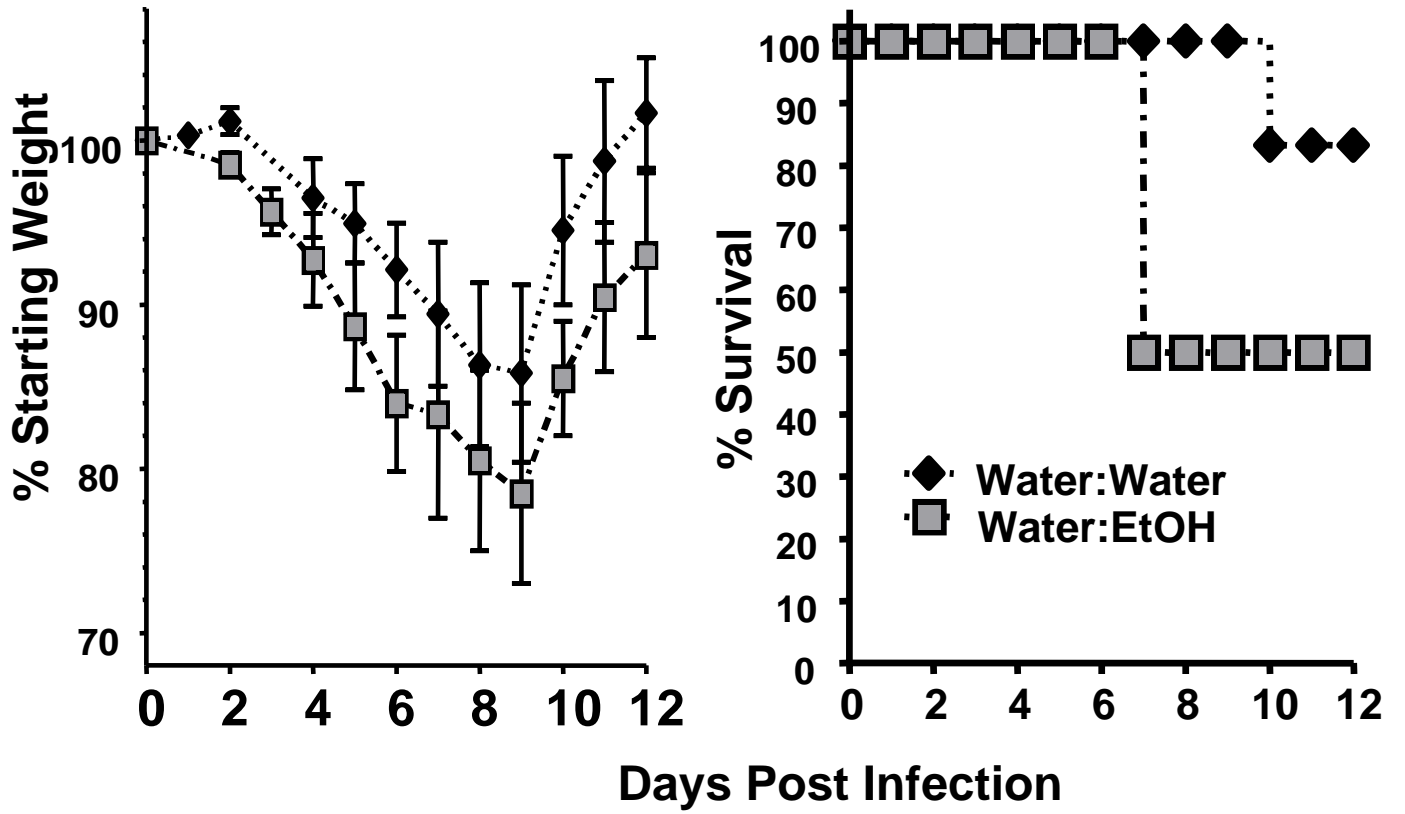

*McGill et al Fig S1.*

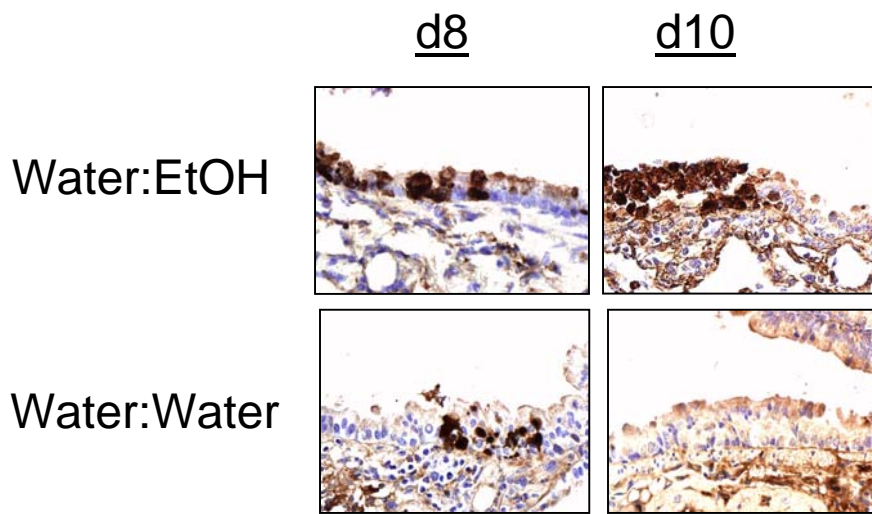

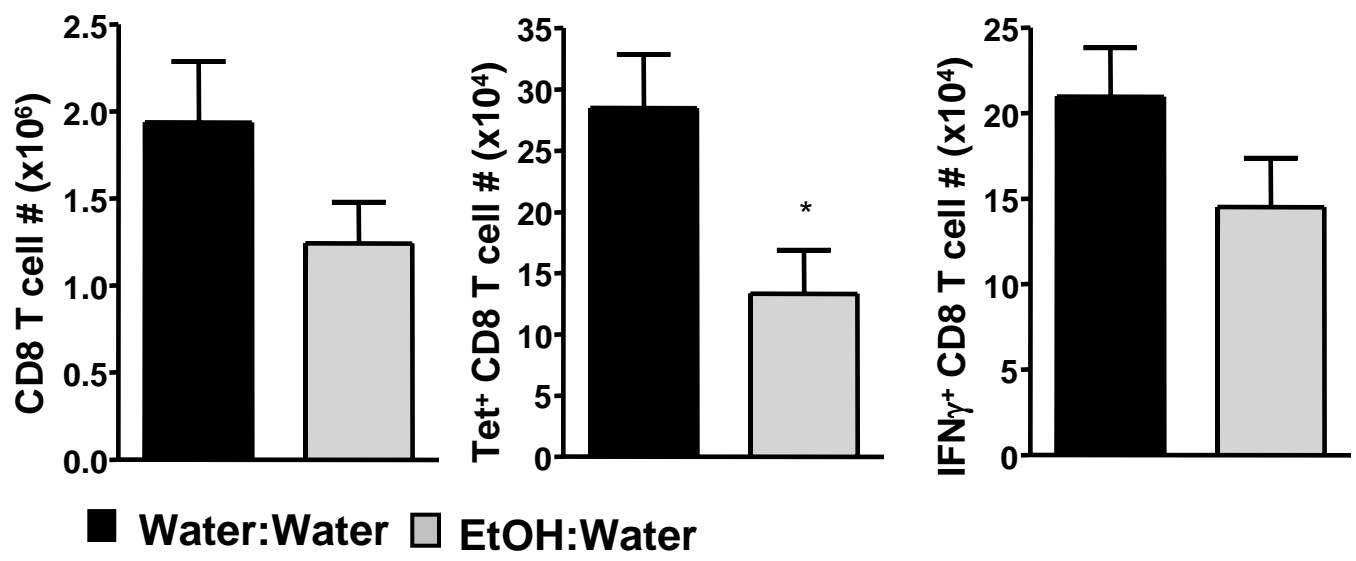

**McGill et al Fig S3.**

**A.**

d10, 40x

Water:EtOH

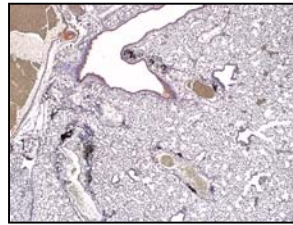

Water:Water

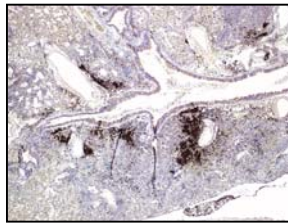

**B.**

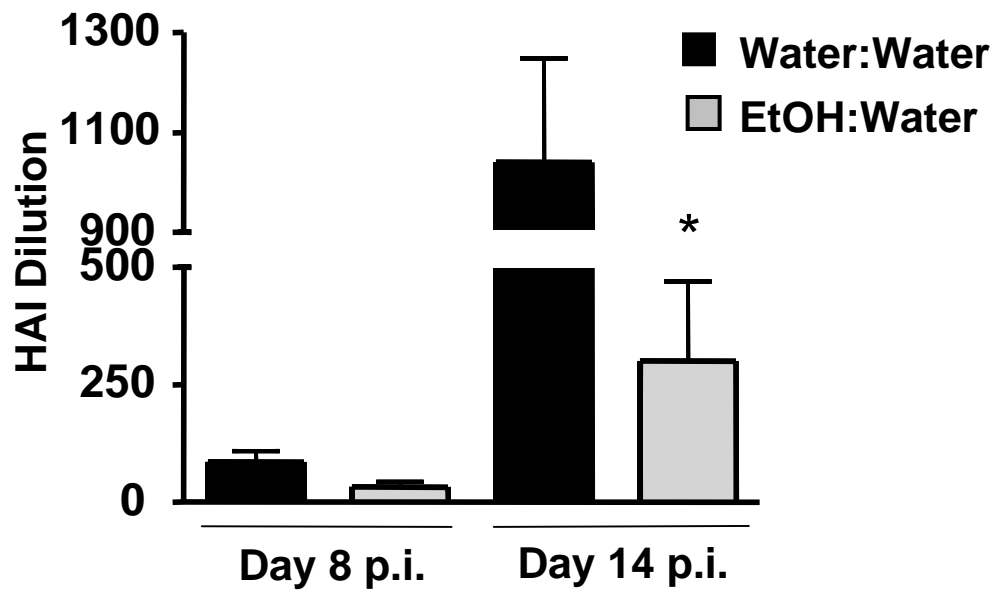

Supplement: NIHMS109708-supplement-Supplementary_Figure.pdf [file NIHMS109708-supplement-Supplementary_Figure.pdf]
